# Supplementary material for: A Next-Generation Adenoviral Vaccine Elicits Mucosal and Systemic Immunogenicity and Reduces Viral Shedding after SARS-CoV-2 Challenge in Nonhuman Primates
Source: MDPI journal article supplement (doi:10.3390/vaccines12020132), 2024-01-27
Supplement: s1 [file s1]

**Table S1.** African Green Monkey immunization group assignments and baseline characteristics.

| <b>Immunization Group</b> | <b>Identification Number</b> | <b>Sex</b> | <b>Body Weight (kg)</b> |
|---------------------------|------------------------------|------------|-------------------------|
| Control                   | 659706                       | Female     | 3.45                    |
|                           | 659585                       | Female     | 4.35                    |
|                           | 659606                       | Male       | 4.90                    |
|                           | 659247                       | Male       | 6.55                    |
|                           | 659845                       | Male       | 6.85                    |
| ED88                      | 659533                       | Female     | 3.80                    |
|                           | 659798                       | Female     | 4.45                    |
|                           | 659366                       | Female     | 4.75                    |
|                           | 200943                       | Male       | 5.55                    |
|                           | 659812                       | Male       | 6.40                    |
|                           | 659377                       | Male       | 7.05                    |
| ED90                      | 659946                       | Female     | 3.95                    |
|                           | 659397                       | Female     | 4.20                    |
|                           | 658193                       | Female     | 4.45                    |
|                           | 659007                       | Male       | 5.55                    |
|                           | 659382                       | Male       | 6.00                    |
|                           | 659460                       | Male       | 7.05                    |
| Protein + ED94            | 658739                       | Female     | 3.95                    |
|                           | 658186                       | Female     | 4.25                    |
|                           | 659333                       | Male       | 5.80                    |
|                           | 659370                       | Male       | 7.35                    |
| ED94                      | 658207                       | Female     | 4.00                    |
|                           | 659187                       | Female     | 4.30                    |
|                           | 658139                       | Female     | 4.95                    |
|                           | 659449                       | Male       | 5.60                    |
|                           | 658727                       | Male       | 6.45                    |
|                           | 659536                       | Male       | 5.58                    |

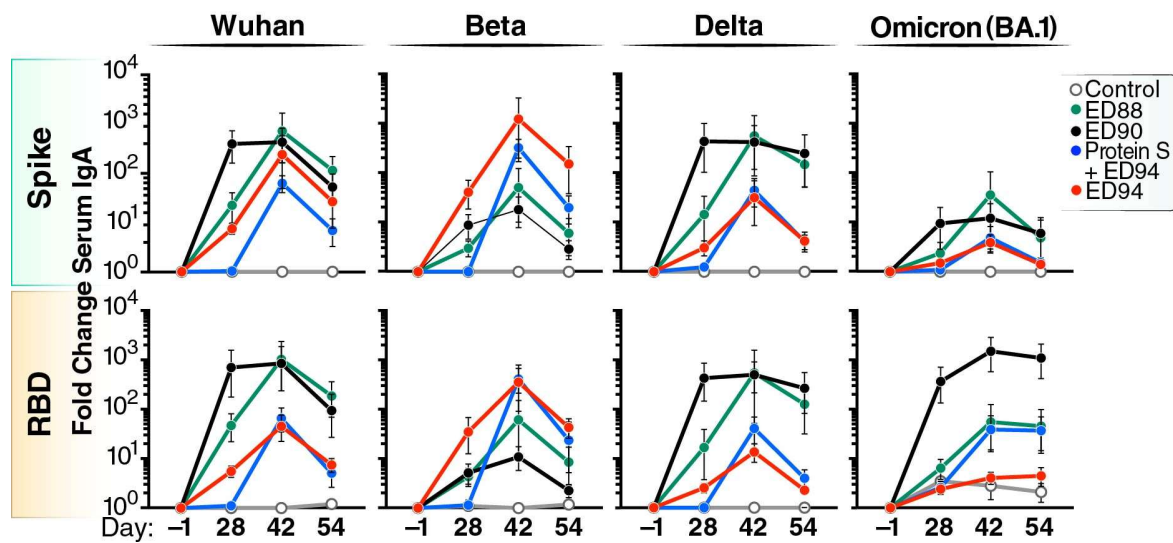

**Figure S1. Mucosal immunization generates cross-reactive serum IgA responses.** Serum spike specific IgA was quantified by MSD against Wuhan, Beta, Delta, and Omicron (BA.1) variants on days -1, 28, 42 and 54. Data include vehicle control animals (open white circles, n = 5), ED88 (green circles, n = 6), ED90 (black circles, n = 6), intramuscular delivery of spike protein followed with ED94 boost (blue circles, n = 4), and ED94 (red circles, n = 6). Data expressed as fold change from baseline at day -1; top row full length trimerized spike, bottom row RBD. Abbreviations: IgA, immunoglobulin A; RBD, receptor binding domain.

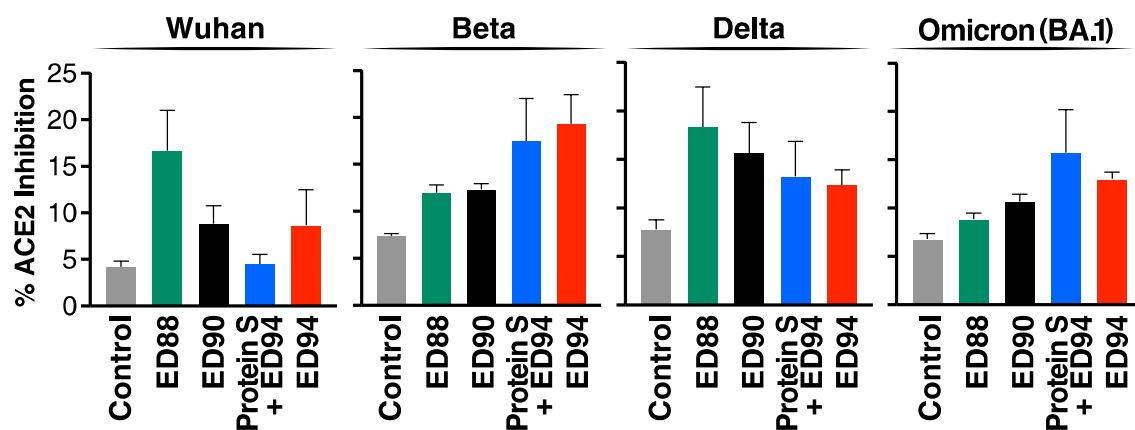

**Figure S2. Mucosal immunization enhances neutralizing antibodies in the lower airways.** Neutralizing antibody activity against the RBD portions of Wuhan, Beta, Delta, and Omicron proteins in BALF by sVNT at day 54 prior to challenge. Data include vehicle control animals (grey bars, n = 5) and vaccinated groups ED88 (green bars, n = 6), ED90 (black bars, n = 6), intramuscular delivery of spike protein followed with ED94 boost (blue bars, n = 4), and ED94 (red bars, n = 6). Data expressed as mean  $\pm$  SEM. Abbreviations: ACE2, angiotensin-converting enzyme-2; BALF, bronchoalveolar lavage fluid; RBD, receptor binding domain; SEM, standard error of the mean; sVNT, surrogate virus neutralization test.
